# Supplementary material for: Ultra-Low Loading of Iron Oxide and Platinum on CVD-Graphene Composites as Effective Electrode Catalysts for Solid Acid Fuel Cells
Source: MDPI journal article supplement (doi:10.3390/catal13081154), 2023-07-26
Supplement: s1 [file s1]

Archive with 1 entries (1 files):
- catalysts-2393566-supplementary.pdf
